# Supplementary figures and images for: Dopamine D2Rs coordinate cue-evoked changes in striatal acetylcholine levels
Source: eLife journal article supplement (doi:10.7554/elife.76111), 2022-07-20

**A**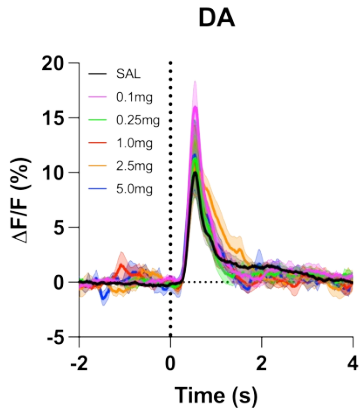**B**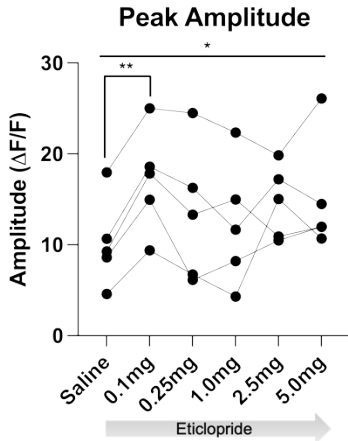**C**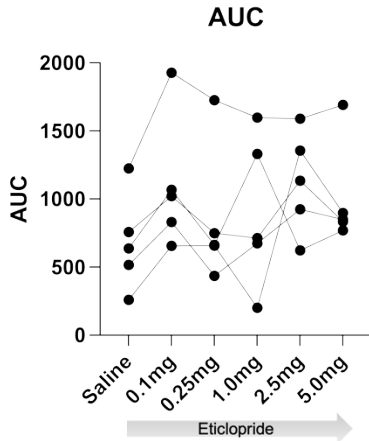

Supplement: supp [file elife-76111-supp-v1.zip]

**A****ACh-DA Trial Correlation**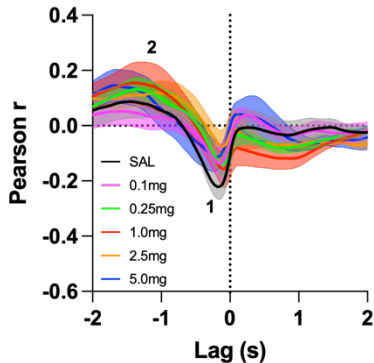**B**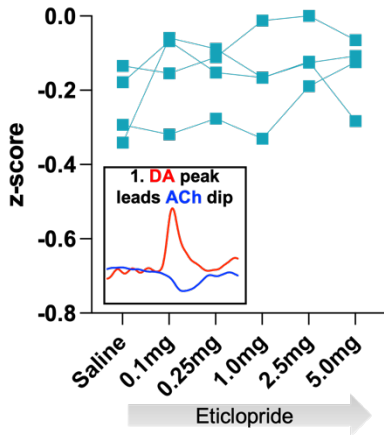**C**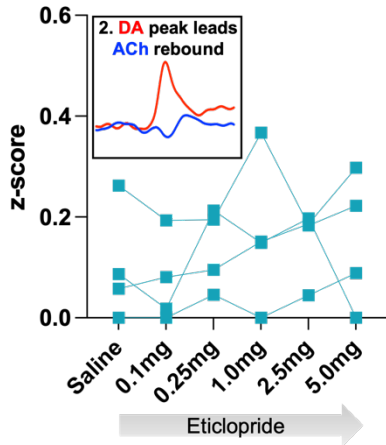

Supplement: supp [file elife-76111-supp-v1.zip]

**A****DA Max Peak**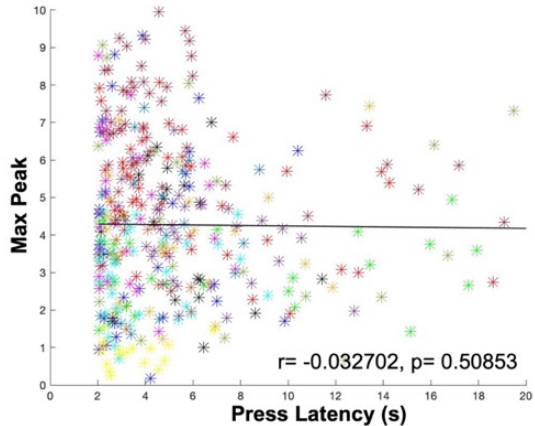**B****DA AUC**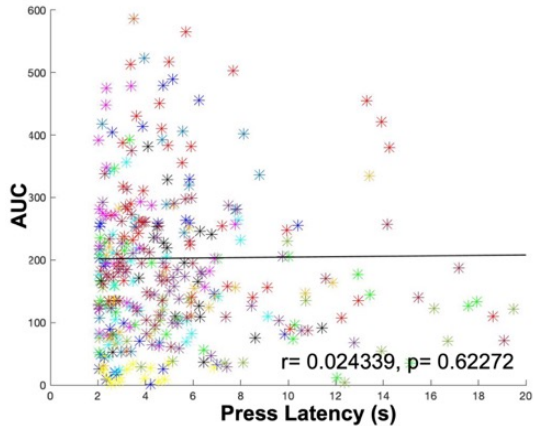

Supplement: supp [file elife-76111-supp-v1.zip]

**A****ACh-DA ITI Correlation**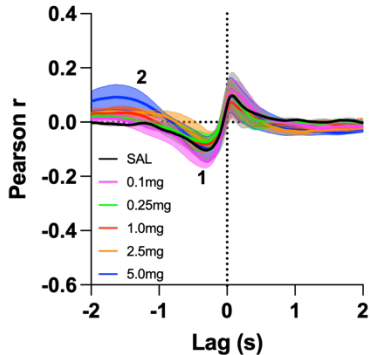**B**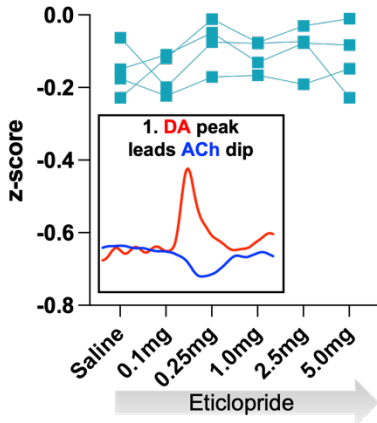**C**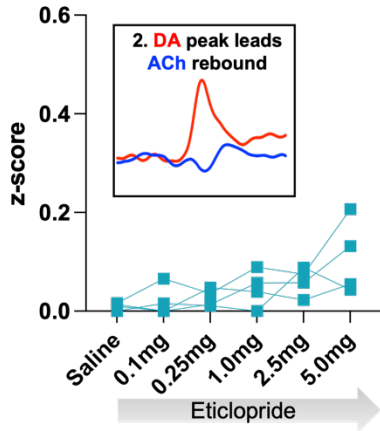

Supplement: supp [file elife-76111-supp-v1.zip]

**A****DA**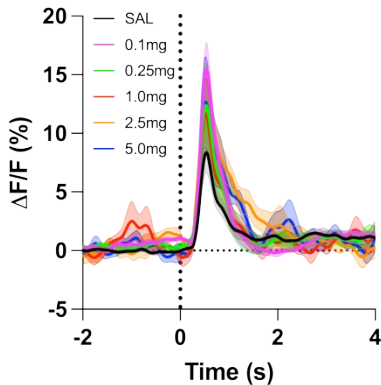**B****Peak Amplitude**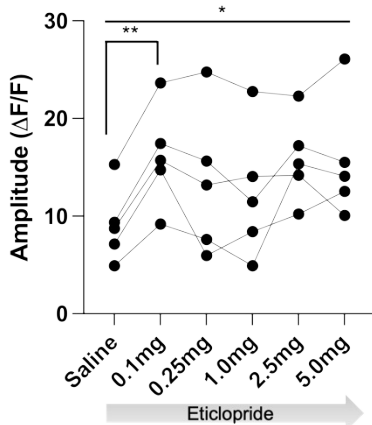**C****AUC**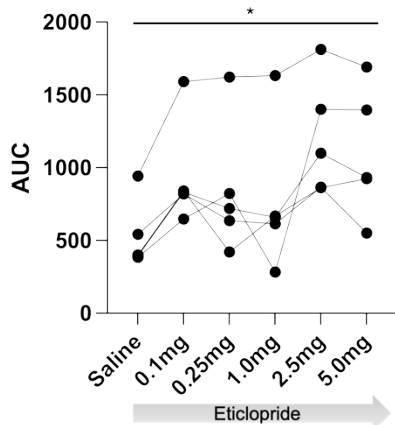

Supplement: supp [file elife-76111-supp-v1.zip]

**A**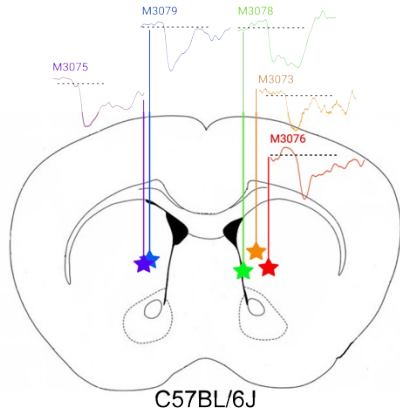**B**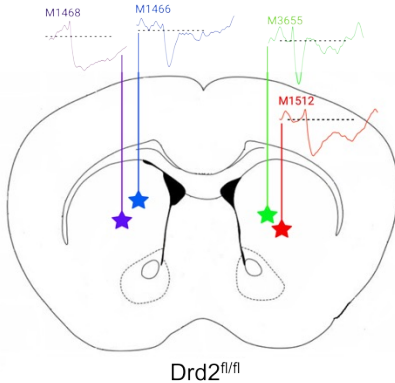**C**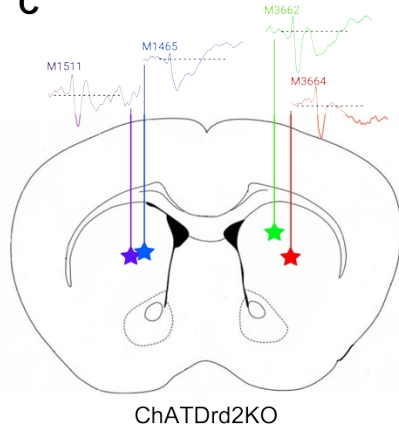

Supplement: supp [file elife-76111-supp-v1.zip]

**A****ACh-DA ITI Correlation**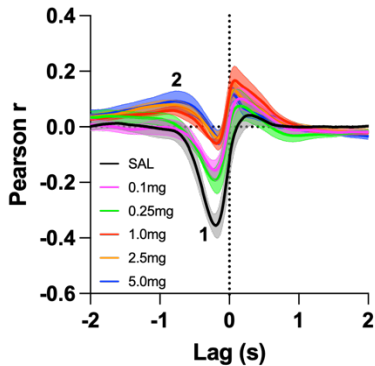**B**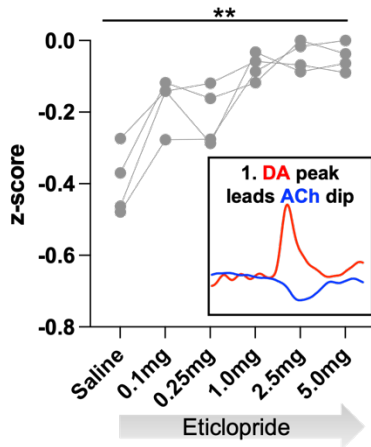**C**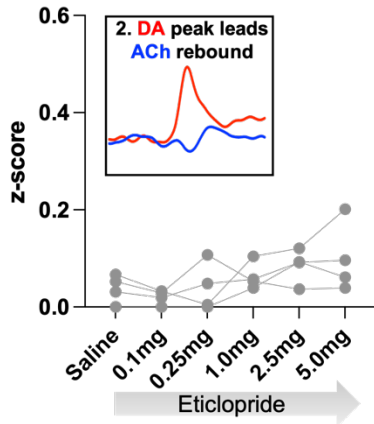

Supplement: supp [file elife-76111-supp-v1.zip]

**A**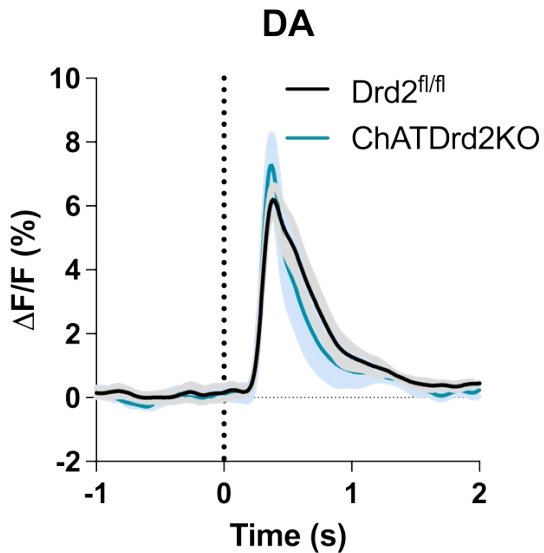**B**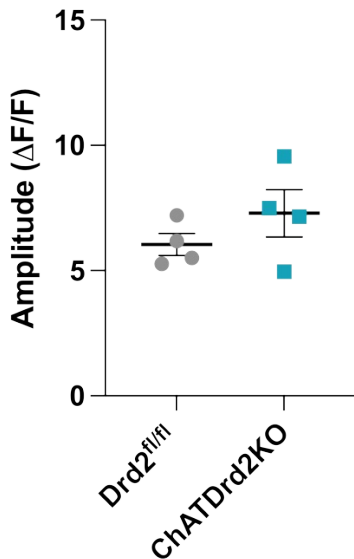

Supplement: supp [file elife-76111-supp-v1.zip]

**A****ACh-DA Trial Correlation**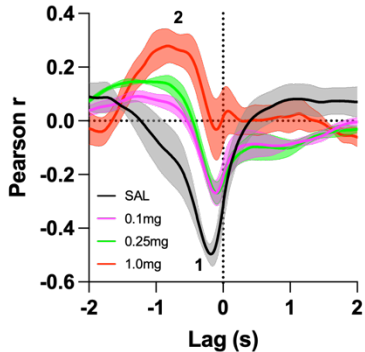**B**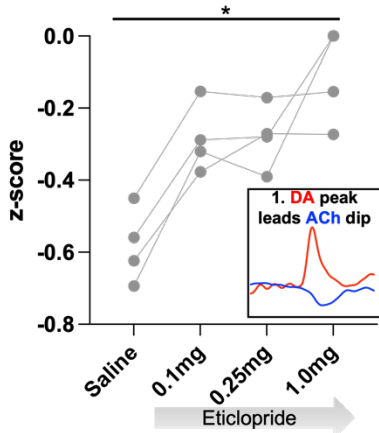**C**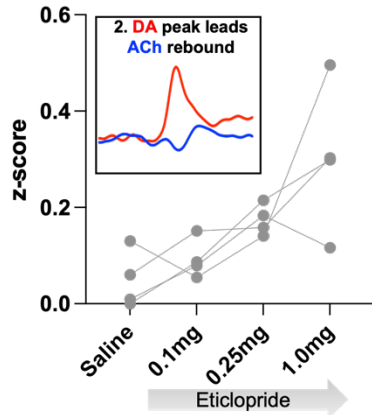

Supplement: supp [file elife-76111-supp-v1.zip]
